# Supplementary material
Source: Springer Nature journal article supplement (https://www.springermedizin.de/resource/supplementary/12939_2010_190_MOESM4_ESM.pdf/9550562)

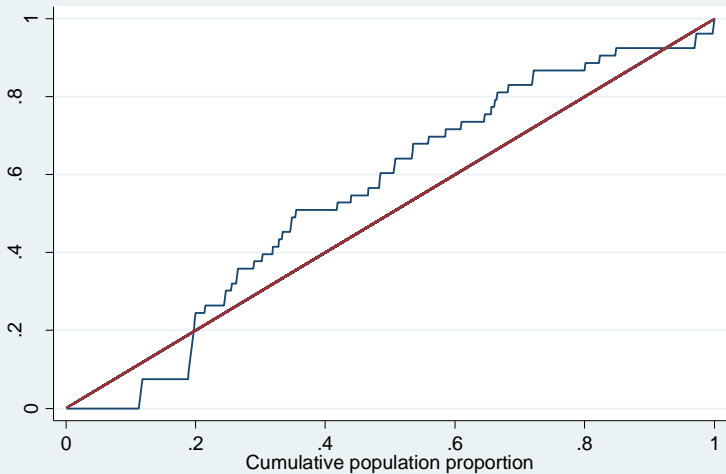

— Conc curve (child mortality <9 months)      — Equality line

Supplement: MOESM4 [file 9550562]
